# Supplementary material
Source: Springer Nature journal article supplement (https://www.springermedizin.de/resource/supplementary/12960_2013_378_MOESM2_ESM.pdf/9569982)

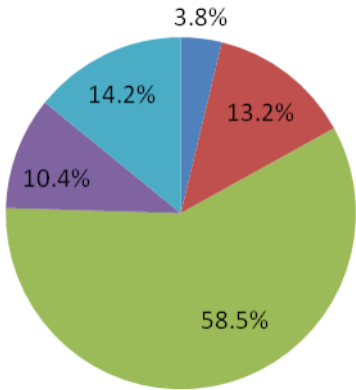

- Professors
- Associate Professors
- Assistant Professors
- Lecturers
- Other ranks

Supplement: MOESM2 [file 9569982]
